# Supplementary material
Source: PubMed Central journal article supplement (PMC2994199)
Supplement: NIHMS126713-supplement-01.pdf [file NIHMS126713-supplement-01.pdf]

# Supplemental Figure 1

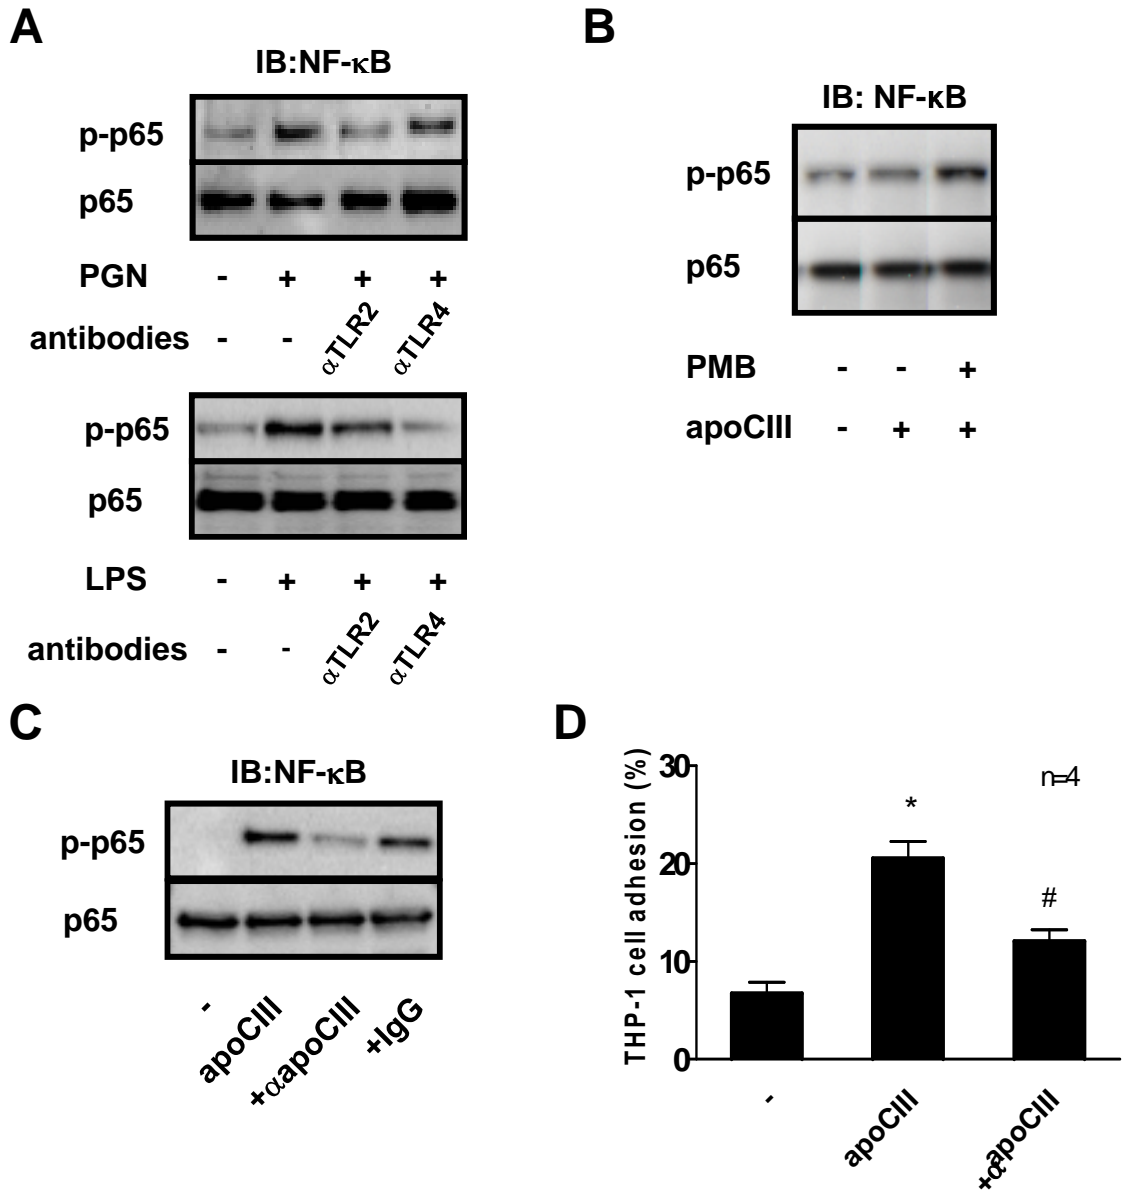

(A) THP-1 cells were pretreated with indicated antibodies (50  $\mu$ g/mL), and then incubated with peptidoglycan (PGN) (10  $\mu$ g/ml) or LPS (200 ng/ml) for 2 hours. (B) THP-1 cells were incubated with apoCIII (100  $\mu$ g/mL) for 2 hours in the presence or absence of polymyxin B (PMB) (0.5  $\mu$ g/ml). (C, D) THP-1 cells were incubated with apoCIII (100  $\mu$ g/mL) for 2 hours (C) or 8 hours (D). In some experiments, apoCIII was pretreated with indicated antibodies (50  $\mu$ g/mL) for 30 minutes. \* $p$ <0.05 vs. apoCIII(-), # $p$ <0.05 vs. apoCIII alone. Blots represent 3 independent experiments using apoCIII from 3 different donors that provided similar results (B, C).

# Supplemental Figure 2

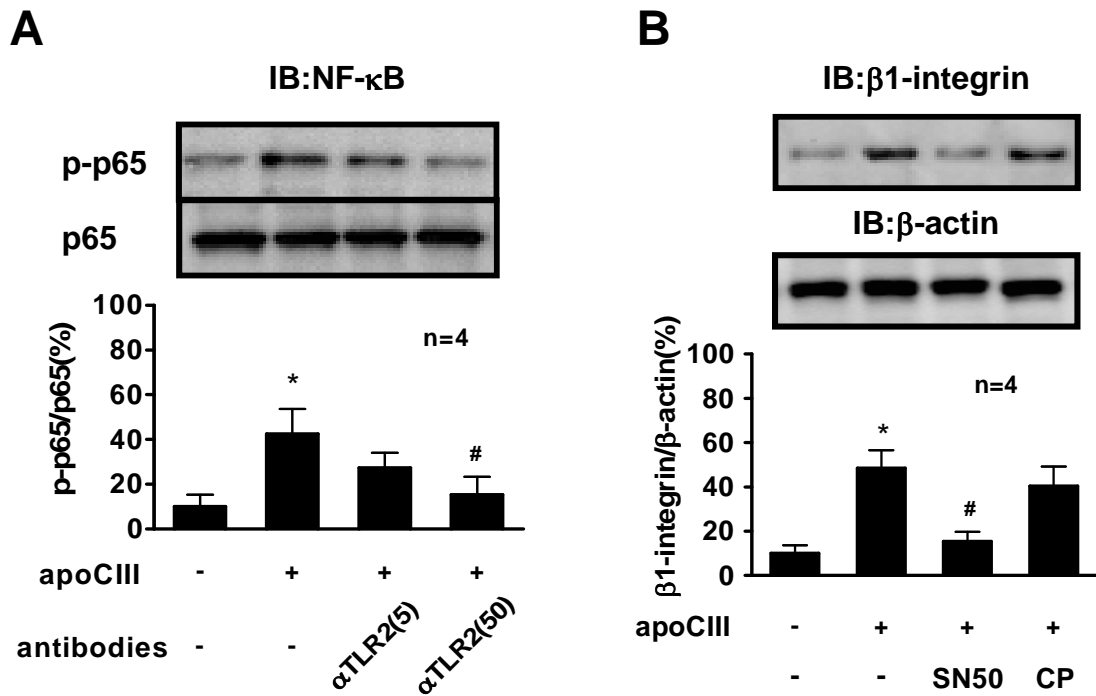

**(A)** Cultured hTLR2-293 cells were incubated with FITC-labeled apoCIII (100  $\mu$ g/mL) for 2 hours. In some experiments, the cells were pretreated with indicated antibodies (50  $\mu$ g/mL) for 30 minutes. \* $p$ <0.01 vs. apoCIII(-)/antibodies(-), # $p$ <0.05 vs. apoCIII(+)/antibodies(-). **(B)** Cultured hTLR2-293 cells were incubated with FITC-labeled apoCIII (100  $\mu$ g/mL) for 8 hours. In some experiments, the cells were pretreated with NF- $\kappa$ B inhibitor SN50 or control scrambled peptide (CP) (20  $\mu$ mol/mL) for 30 minutes. \* $p$ <0.01 vs. apoCIII(-)/inhibitors(-), # $p$ <0.05 vs. apoCIII(+)/inhibitors(-). Blots represent 4 independent experiments using apoCIII from 4 different donors that provided similar results.

# Supplemental Figure 3

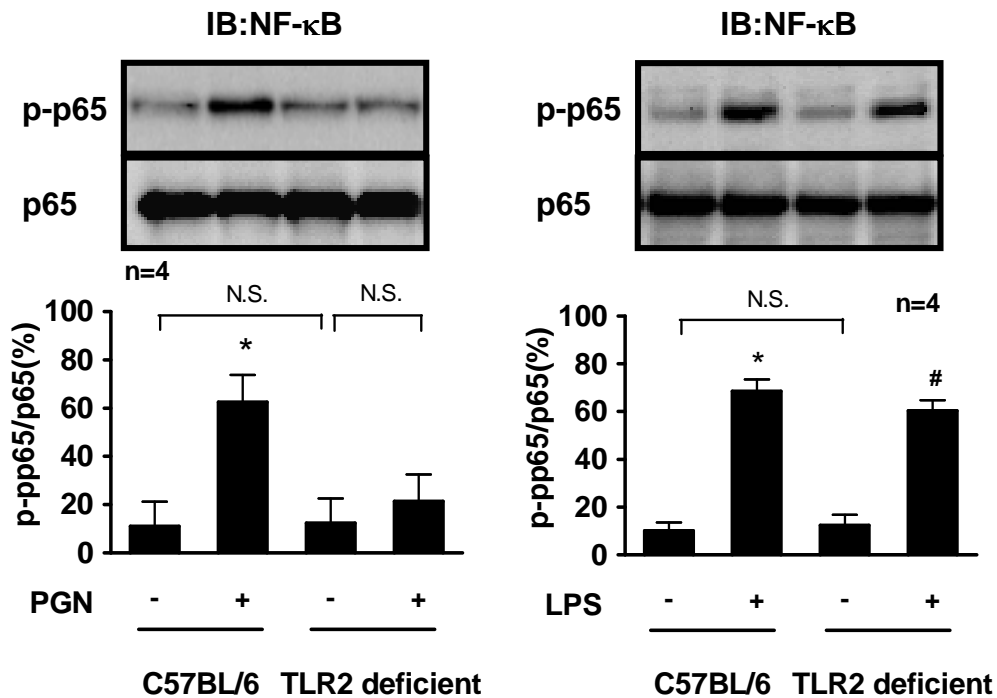

Monocytes isolated from indicated mice were incubated with peptidoglycan (PGN) (10  $\mu$ g/ml) or LPS (200 ng/ml) for 2 hours. \* $p < 0.01$  vs. PGN(-) or LPS(-)/C57BL/6, # $p < 0.01$  vs. LPS(-)/TLR2 deficient. Blots represent 4 independent experiments that provided similar results.
